# Supplementary material for: Deglacial sea level history of the East Siberian Sea and Chukchi Sea margins
Source: Copernicus journal article supplement (doi:10.5194/cp-13-1097-2017), 2017-09-05
Supplement: Supplementary file 1 [file cp-13-1097-2017-supplement.zip]

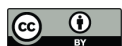

## *Supplement of*

# **Deglacial sea level history of the East Siberian Sea and Chukchi Sea margins**

**Thomas M. Cronin et al.**

*Correspondence to:* Thomas M. Cronin ([tcronin@usgs.gov](mailto:tcronin@usgs.gov))

- [cp-13-1097-2017-supplement-title-page.pdf](#)
- [Appendix-CP-2017-19CroninSWERUS.xlsx](#)

The copyright of individual parts of the supplement might differ from the CC BY 3.0 License.
